# Supplementary material for: Electronically excited states of cob(ii)alamin: insights from CASSCF/XMCQDPT2 and TD-DFT calculations
Source: Royal Society of Chemistry journal article supplement (doi:10.1039/c5cp06439b), 2015-12-16
Supplement: c5cp06439b1.pdf [file c5cp06439b1.pdf]

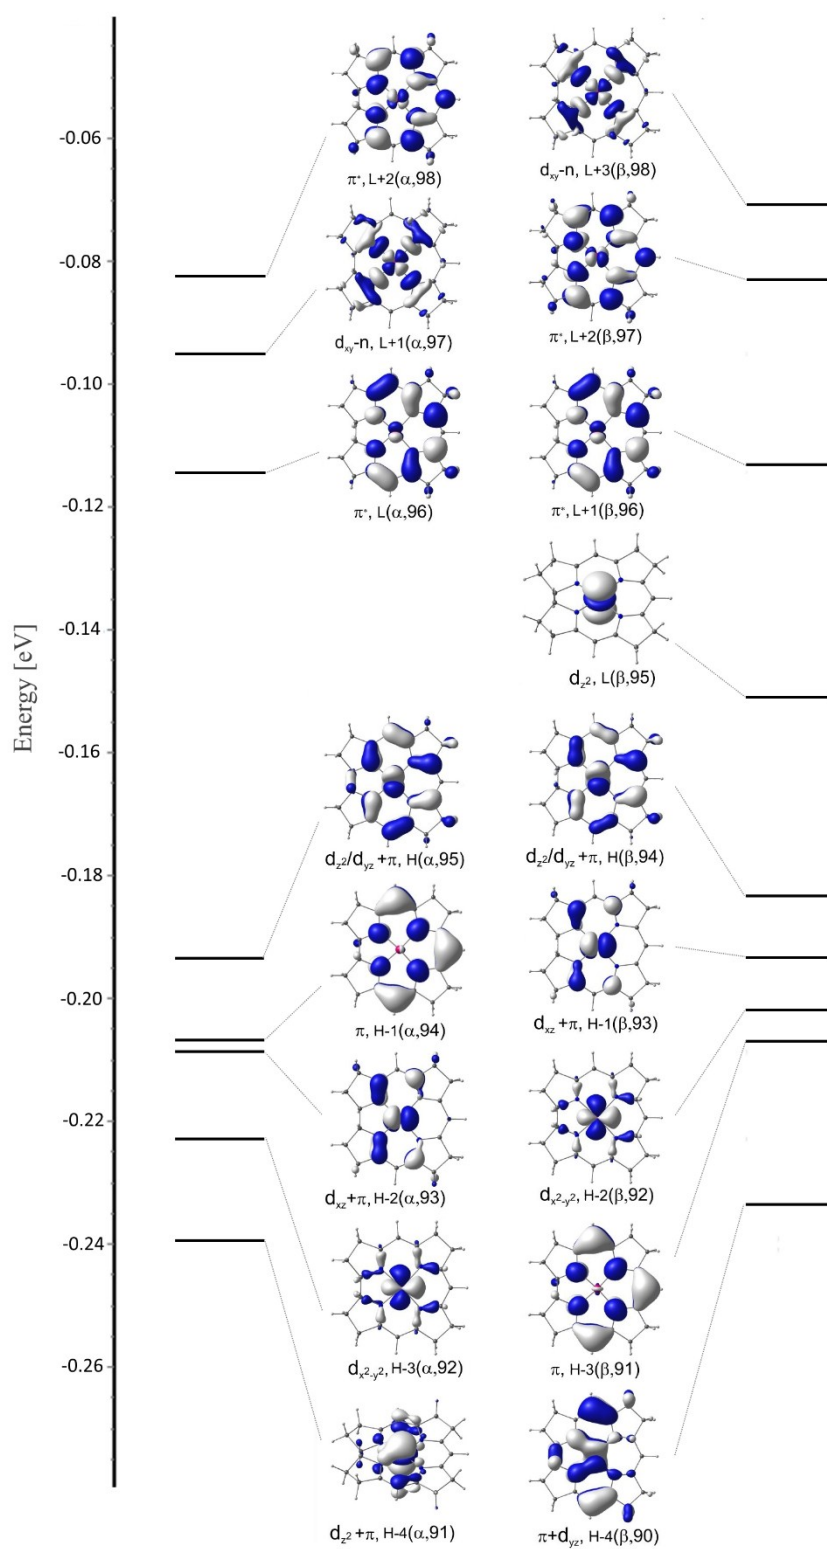

**Figure S1.** Isosurface plots of selected frontier MOs for [Co<sup>II</sup>(corrin)]<sup>+</sup> based on uBP86/6-311G(d,p) TD-DFT calculations.

**Table S1.** The 10 lowest excited states of  $[\text{Co}^{\text{II}}(\text{corrin})]^+$ , obtained from TD-DFT/BP86/6-311G(d,p) calculations.

|                 | E(eV) | $\lambda(\text{nm})$ | $f$    | Coeff. | Character                                   |                                             |                                        |
|-----------------|-------|----------------------|--------|--------|---------------------------------------------|---------------------------------------------|----------------------------------------|
| D <sub>1</sub>  | 0.45  | 2767.4               | 0.0000 | 100    | 94( $\beta$ ) $\rightarrow$ 95( $\beta$ )   | H( $\beta$ ) $\rightarrow$ L( $\beta$ )     | $d_{yz} + \pi \rightarrow d_z^2$       |
| D <sub>2</sub>  | 0.68  | 1834.9               | 0.0000 | 100    | 93( $\beta$ ) $\rightarrow$ 95( $\beta$ )   | H-1( $\beta$ ) $\rightarrow$ L( $\beta$ )   | $d_{xz} + \pi \rightarrow d_z^2$       |
| D <sub>3</sub>  | 1.38  | 898.9                | 0.0007 | 99     | 92( $\beta$ ) $\rightarrow$ 95( $\beta$ )   | H-2( $\beta$ ) $\rightarrow$ L( $\beta$ )   | $d_x^2 - y^2 \rightarrow d_z^2$        |
| D <sub>4</sub>  | 1.52  | 816.6                | 0.0003 | 99     | 91( $\beta$ ) $\rightarrow$ 95( $\beta$ )   | H-3( $\beta$ ) $\rightarrow$ L( $\beta$ )   | $\pi \rightarrow d_z^2$                |
| D <sub>5</sub>  | 1.73  | 716.0                | 0.0005 | 39     | 95( $\alpha$ ) $\rightarrow$ 96( $\alpha$ ) | H( $\alpha$ ) $\rightarrow$ L( $\alpha$ )   | $d_{yz} + \pi \rightarrow \pi^*$       |
|                 |       |                      |        | 61     | 94( $\beta$ ) $\rightarrow$ 96( $\beta$ )   | H( $\beta$ ) $\rightarrow$ L+1( $\beta$ )   | $d_{yz} + \pi \rightarrow \pi^*$       |
| D <sub>6</sub>  | 2.13  | 583.3                | 0.0002 | 99     | 90( $\beta$ ) $\rightarrow$ 95( $\beta$ )   | H-4( $\beta$ ) $\rightarrow$ L( $\beta$ )   | $\pi + d_{yz} \rightarrow d_z^2$       |
|                 |       |                      |        |        |                                             | H-1( $\beta$ ) $\rightarrow$ L+1( $\beta$ ) | $d_{xz} + \pi \rightarrow \pi^*$       |
| D <sub>7</sub>  | 2.13  | 582.2                | 0.0034 | 8      | 93( $\beta$ ) $\rightarrow$ 96( $\beta$ )   |                                             |                                        |
|                 |       |                      |        | 92     | 94( $\alpha$ ) $\rightarrow$ 96( $\alpha$ ) | H-1( $\alpha$ ) $\rightarrow$ L( $\alpha$ ) | $d_{xz} + \pi \rightarrow \pi^*$       |
|                 |       |                      |        |        |                                             | H( $\alpha$ ) $\rightarrow$ L+1( $\alpha$ ) | $\pi \rightarrow \pi^*$                |
|                 |       |                      |        |        |                                             |                                             |                                        |
| D <sub>8</sub>  | 2.34  | 529.2                | 0.0002 | 37     | 95( $\alpha$ ) $\rightarrow$ 97( $\alpha$ ) |                                             |                                        |
|                 |       |                      |        | 15     | 95( $\alpha$ ) $\rightarrow$ 97( $\alpha$ ) | H( $\alpha$ ) $\rightarrow$ L+1( $\alpha$ ) | $d_{yz} + \pi \rightarrow d_{xy-n}$    |
|                 |       |                      |        | 38     | 94( $\beta$ ) $\rightarrow$ 98( $\beta$ )   | H( $\beta$ ) $\rightarrow$ L+3( $\beta$ )   | $\pi \rightarrow \pi^*$                |
|                 |       |                      |        | 11     | 94( $\beta$ ) $\rightarrow$ 98( $\beta$ )   | H( $\beta$ ) $\rightarrow$ L+3( $\beta$ )   | $d_{yz} + \pi \rightarrow d_{xy-n}$    |
| D <sub>9</sub>  | 2.37  | 523.9                | 0.0000 | 47     | 95( $\alpha$ ) $\rightarrow$ 97( $\alpha$ ) | H( $\alpha$ ) $\rightarrow$ L+1( $\alpha$ ) | $d_{yz} + \pi \rightarrow d_{xy-n}$    |
|                 |       |                      |        | 12     | 95( $\alpha$ ) $\rightarrow$ 97( $\alpha$ ) | H( $\alpha$ ) $\rightarrow$ L+1( $\alpha$ ) | $\pi \rightarrow \pi^*$                |
|                 |       |                      |        | 26     | 94( $\beta$ ) $\rightarrow$ 98( $\beta$ )   | H( $\beta$ ) $\rightarrow$ L+3( $\beta$ )   | $d_{yz} + \pi \rightarrow d_{xy-n}$    |
|                 |       |                      |        | 15     | 94( $\beta$ ) $\rightarrow$ 98( $\beta$ )   | H( $\beta$ ) $\rightarrow$ L+3( $\beta$ )   | $\pi \rightarrow \pi^*$                |
| D <sub>10</sub> | 2.38  | 520.8                | 0.0006 | 4      | 95( $\alpha$ ) $\rightarrow$ 96( $\alpha$ ) | H( $\alpha$ ) $\rightarrow$ L( $\alpha$ )   | $d_z^2/d_{yz} + \pi \rightarrow \pi^*$ |
|                 |       |                      |        | 96     | 93( $\beta$ ) $\rightarrow$ 97( $\beta$ )   | H-1( $\beta$ ) $\rightarrow$ L+2( $\beta$ ) | $d_x^2 - y^2 \rightarrow \pi^*$        |

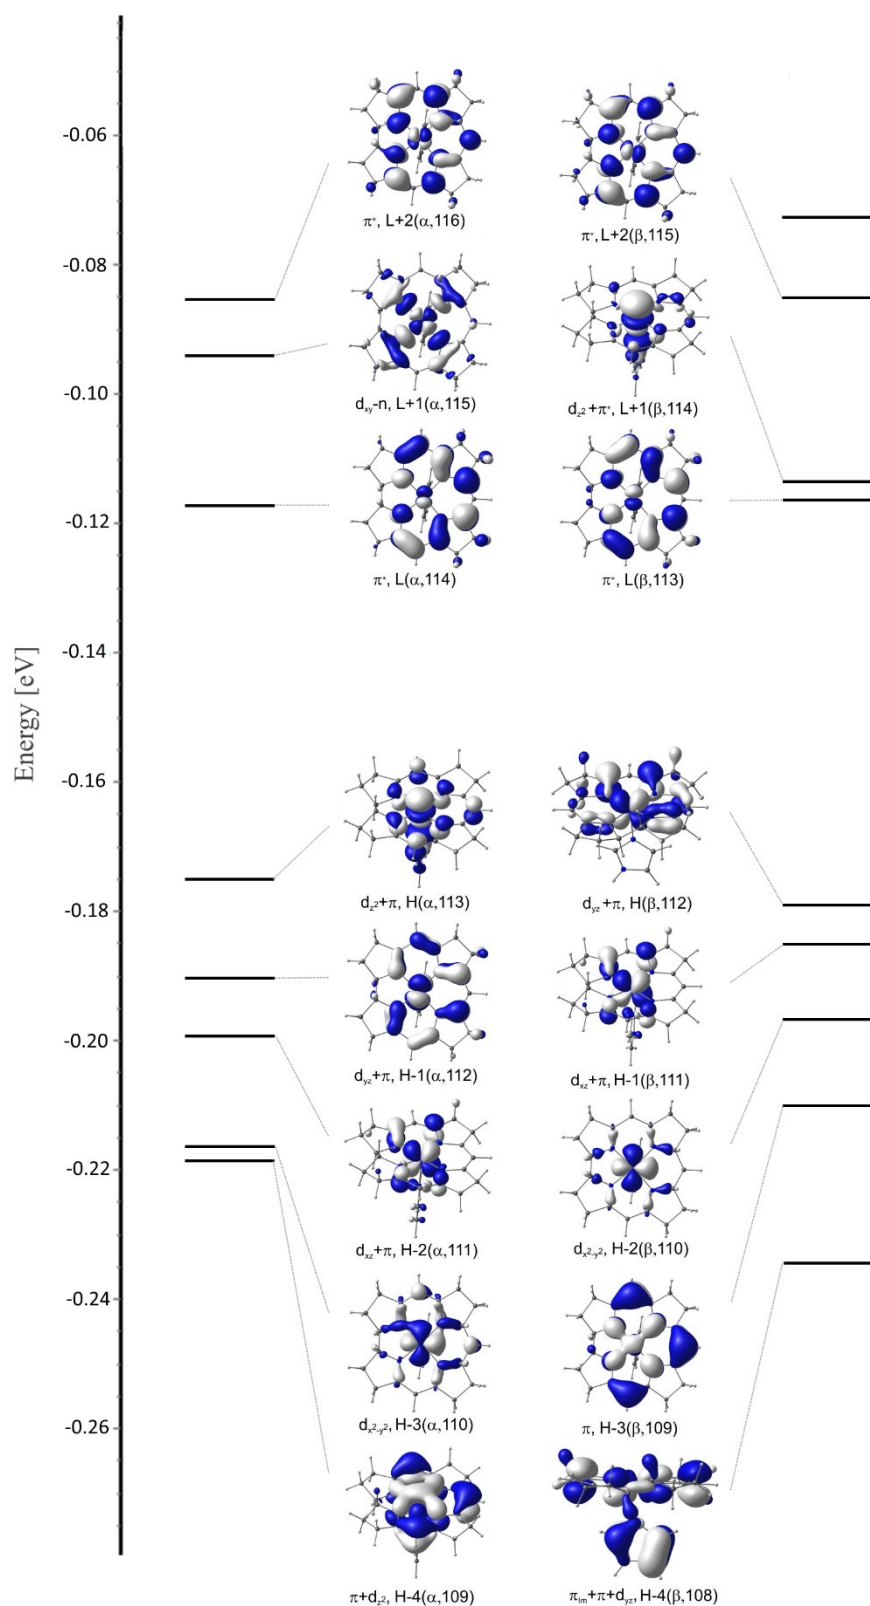

**Figure S2.** Isosurface plots of selected frontier MOs for [Im-Co<sup>II</sup>(corrin)]<sup>+</sup> based on uBP86/6-311G(d,p) calculations .

**Table S2** The 10 lowest excited states of [Im-Co<sup>II</sup>(corrin)]<sup>+</sup> (2.13 Å min) obtained from TDDFT/BP86/6-311G(d,p) calculations.

|                 | E(eV) | λ(nm) | <i>f</i> | NTO<br>Coeff. | TDDFT<br>Character |                 |                                                    |
|-----------------|-------|-------|----------|---------------|--------------------|-----------------|----------------------------------------------------|
| D <sub>1</sub>  | 1.40  | 884.9 | 0.0001   | 31            | 113(α) → 114(α)    | H(α) → L(α)     | $d_z^2 + \pi_{1m} \rightarrow \pi^*$               |
|                 |       |       |          | 69            | 112(β) → 114(β)    | H(β) → L+1(β)   | $d_{yz} + \pi \rightarrow d_z^2 + \pi_{1m}^*$      |
| D <sub>2</sub>  | 1.50  | 826.3 | 0.0008   | 36            | 112(α) → 114(α)    | H-1(α) → L(α)   | $d_{yz} + \pi \rightarrow \pi^*$                   |
|                 |       |       |          | 64            | 112(β) → 113(β)    | H(β) → L(β)     | $d_{yz} + \pi \rightarrow \pi^*$                   |
| D <sub>3</sub>  | 1.59  | 779.5 | 0.0010   | 17            | 113(α) → 114(α)    | H(α) → L(α)     | $d_z^2 + \pi_{1m} \rightarrow \pi^*$               |
|                 |       |       |          | 83            | 111(β) → 113(β)    | H-1(β) → L+1(β) | $d_{xz} + \pi \rightarrow d_z^2 + \pi_{1m}^*$      |
| D <sub>4</sub>  | 1.65  | 752.0 | 0.0026   | 52            | 113(α) → 114(α)    | H(α) → L(α)     | $d_z^2 + \pi_{1m} \rightarrow \pi^*$               |
|                 |       |       |          | 48            | 112(β) → 114(β)    | H(β) → L+1(β)   | $d_{yz} + \pi \rightarrow d_z^2 + \pi_{1m}^*$      |
| D <sub>5</sub>  | 1.81  | 683.3 | 0.0028   | 8             | 111(α) → 114(α)    | H-2(α) → L(α)   | $d_{xz} + \pi_{1m} \rightarrow \pi^*$              |
|                 |       |       |          | 92            | 111(β) → 113(β)    | H-1(β) → L+1(β) | $d_{xz} + \pi_{1m} \rightarrow \pi^*$              |
| D <sub>6</sub>  | 2.13  | 583.6 | 0.0094   | 25            | 112(α) → 114(α)    | H-1(α) → L(α)   | $d_{yz} + \pi \rightarrow \pi^*$                   |
|                 |       |       |          | 75            | 110(β) → 113(β)    | H-2(β) → L+1(β) | $d_{x^2-y^2} + \pi \rightarrow d_z^2 + \pi_{1m}^*$ |
| D <sub>7</sub>  | 2.15  | 576.8 | 0.0045   | 57            | 113(α) → 115(α)    | H(α) → L+1(α)   | $d_{z^2} + \pi_{1m} \rightarrow d_{xy-n}$          |
|                 |       |       |          | 34            | 111(α) → 114(α)    | H-2(α) → L(α)   | $d_{xz} + \pi \rightarrow \pi^*$                   |
|                 |       |       |          | 8             | 110(β) → 113(β)    | H-2(β) → L(β)   | $d_{x^2-y^2} \rightarrow \pi^*$                    |
| D <sub>8</sub>  | 2.17  | 570.5 | 0.0062   | 14            | 112(α) → 114(α)    | H-2(α) → L(α)   | $d_{yz} + \pi \rightarrow \pi^*$                   |
|                 |       |       |          | 86            | 110(β) → 113(β)    | H-2(β) → L(β)   | $d_{x^2-y^2} + \pi \rightarrow \pi^*$              |
| D <sub>9</sub>  | 2.22  | 557.6 | 0.0004   | 62            | 112(α) → 115(α)    | H-1(α) → L+1(α) | $d_{yz} + \pi \rightarrow d_{xy-n}$                |
|                 |       |       |          | 38            | 112(β) → 116(β)    | H(β) → L+3(β)   | $d_{yz} + \pi \rightarrow d_{xy-n}$                |
| D <sub>10</sub> | 2.28  | 543.5 | 0.0026   | 54            | 111(α) → 114(α)    | H-2(α) → L(α)   | $d_{xz} + \pi \rightarrow \pi^*$                   |
|                 |       |       |          | 33            | 111(α) → 115(α)    | H-2(α) → L+1(α) | $d_{xz} + \pi \rightarrow d_{xy-n}$                |
|                 |       |       |          | 14            | 112(β) → 114(β)    | H(β) → L+1(β)   | $d_{yz} + \pi \rightarrow d_z^2 + \pi^*$           |

**Table S3.** Comparison of Co  $3d \rightarrow 3d_z^2$  transition energies of  $\text{Co}^{\text{II}}(\text{corrin})^+$  obtained from experimental and computed results through MCD spectrum, TDDFT, CASSCF/MC-XQDPT2 and SORCI approaches.

|                               | donor MO                           |                                    |                                   |
|-------------------------------|------------------------------------|------------------------------------|-----------------------------------|
|                               | $3d_{yz}$                          | $3d_{xz}$                          | $3d_{x^2-y^2}$                    |
| MCD expt <sup>a</sup>         | < 1.16 eV (9000 $\text{cm}^{-1}$ ) | < 1.16 eV (9000 $\text{cm}^{-1}$ ) | 1.68 eV (16500 $\text{cm}^{-1}$ ) |
| TDDFT(4coord)                 | 0.45 eV                            | 0.68 eV                            | 1.38 eV                           |
| TDDFT <sub>(LF 5-coord)</sub> | 0.72 eV                            | 0.91 eV                            | 1.55 eV                           |
| CASSCF/<br>MC-XQDPT2          | 0.01 eV                            | 0.01eV                             | 1.35 eV                           |
| SORCI <sup>a</sup>            | 0.03 eV (256 $\text{cm}^{-1}$ )    | 0.26 eV (2154 $\text{cm}^{-1}$ )   | 1.16 eV (9389 $\text{cm}^{-1}$ )  |

<sup>a</sup> Data from ref. 12.

**Table S4.** Comparison of Co  $3d \rightarrow 3d_{z^2}$  transition energies of  $\text{Im}^{-}[\text{Co}^{\text{II}}(\text{corrin})]^+$  obtained from experimental and computed results through MCD spectrum, TDDFT, CASSCF/XMCQDPT2 and SORCI approaches.

|                           | donor MO                         |                                  |                                   |
|---------------------------|----------------------------------|----------------------------------|-----------------------------------|
|                           | $3d_{yz}$                        | $3d_{xz}$                        | $3d_{x^2-y^2}$                    |
| MCD expt <sup>a</sup>     | 1.79 eV (14470cm <sup>-1</sup> ) | 1.79 eV (14470cm <sup>-1</sup> ) | 2.19 eV (17700 cm <sup>-1</sup> ) |
| TDDFT <sub>(trunc.)</sub> | 1.40 eV                          | 1.59 eV                          | 2.13 eV                           |
| TDDFT <sub>(full)</sub>   | 1.27 eV                          | 1.42 eV                          | 2.08 eV                           |
| TDDFT <sub>(LF)</sub>     | 0.72 eV                          | 0.91 eV                          | 1.55 eV                           |
| CASSCF/<br>XMCQDPT2       | 0.90 eV                          | 0.90 eV                          | 2.09 eV                           |

<sup>a</sup> read from ref. 24.

**Table S5.** The 10 lowest excited states [Im-Co<sup>II</sup>(corrin)]<sup>+</sup> (1.85 Å) obtained from TDDFT/BP86/6-311G(d,p) calculations.

|                 | E(eV) | λ(nm)  | <i>f</i> | Coeff. | TDDFT Character |                 |                                                           |
|-----------------|-------|--------|----------|--------|-----------------|-----------------|-----------------------------------------------------------|
| D <sub>1</sub>  | 0.83  | 1495.1 | 0.0007   | 99     | 112(α) → 113(α) | H-2(α) → L(α)   | $d_z^2 + \pi_{1m} \rightarrow \pi^*$                      |
|                 |       |        |          | 1      | 91(β) → 96(β)   | H-3(β) → L+1(β) | $d_{yz} + \pi \rightarrow d_z^2 + \pi_{1m}^*$             |
| D <sub>2</sub>  | 1.50  | 829.3  | 0.0004   | 34     | 93(α) → 96(α)   | H-2(α) → L(α)   | $\pi \rightarrow \pi^*$                                   |
|                 |       |        |          | 66     | 91(β) → 96(β)   | H-3(β) → L+1(β) | $\pi \rightarrow \pi^*$                                   |
| D <sub>3</sub>  | 1.54  | 805.7  | 0.0016   | 92     | 93(α) → 96(α)   | H-2(α) → L(α)   | $d_z^2 + \pi_{1m} \rightarrow d_{xy-n}$                   |
|                 |       |        |          | 8      | 91(β) → 96(β)   | H-3(β) → L+1(β) | $d_{yx} + \pi \rightarrow \pi^*$                          |
| D <sub>4</sub>  | 1.69  | 731.9  | 0.0005   | 92     | 93(α) → 96(α)   | H-2(α) → L(α)   | $d_z^2 + \pi_{1m} \rightarrow \pi^*$                      |
|                 |       |        |          | 8      | 91(β) → 96(β)   | H-3(β) → L+1(β) | $d_{yz} + \pi + \pi_{1m} \rightarrow d_z^2 + \pi$         |
| D <sub>5</sub>  | 1.77  | 699.3  | 0.0018   | 11     | 93(α) → 96(α)   | H-2(α) → L(α)   | $d_{xz} + \pi + \pi_{1m} \rightarrow \pi^*$               |
|                 |       |        |          | 89     | 91(β) → 96(β)   | H-3(β) → L+1(β) | $d_{xz} + \pi + \pi_{1m} \rightarrow \pi^*$               |
| D <sub>6</sub>  | 2.04  | 608.1  | 0.0007   | 6      | 93(α) → 96(α)   | H-2(α) → L(α)   | $d_{xz} + \pi + \pi_{1m} \rightarrow \pi^*$               |
|                 |       |        |          | 94     | 91(β) → 96(β)   | H-3(β) → L+1(β) | $d_{yx} + \pi \rightarrow d_z^2 + \pi$                    |
| D <sub>7</sub>  | 2.14  | 578.6  | 0.0041   | 60     | 93(α) → 96(α)   | H-2(α) → L(α)   | $d_{xz} + \pi + \pi_{1m} \rightarrow \pi^*$               |
|                 |       |        |          | 40     | 91(β) → 96(β)   | H-3(β) → L+1(β) | $d_z^2 / d_{yz} + \pi + \pi_{1m} \rightarrow d_z^2 + \pi$ |
| D <sub>8</sub>  | 2.16  | 574.9  | 0.0031   | 28     | 93(α) → 96(α)   | H-2(α) → L(α)   | $d_{xz} + \pi + \pi_{1m} \rightarrow \pi^*$               |
|                 |       |        |          | 72     | 91(β) → 96(β)   | H-3(β) → L+1(β) | $d_x^2 - y^2 \rightarrow \pi^*$                           |
| D <sub>9</sub>  | 2.18  | 568.7  | 0.0061   | 8      | 93(α) → 96(α)   | H-2(α) → L(α)   | $d_{yx} + \pi \rightarrow \pi^*$                          |
|                 |       |        |          | 68     | 91(β) → 96(β)   | H-3(β) → L+1(β) | $d_{yx} + \pi \rightarrow d_z^2 + \pi_{1m}$               |
| D <sub>10</sub> | 2.24  | 553.0  | 0.0044   | 24     | 91(β) → 96(β)   | H-3(β) → L+1(β) | $d_x^2 - y^2 \rightarrow \pi^*$                           |
|                 |       |        |          | 61     | 93(α) → 96(α)   | H-2(α) → L(α)   | $d_{yx} + \pi \rightarrow d_{xy-n}$                       |
|                 |       |        |          | 39     | 91(β) → 96(β)   | H-3(β) → L+1(β) | $d_{yx} + \pi \rightarrow d_{xy-n}$                       |

**Figure S3.** NTOs for [Im-Co<sup>II</sup>(corrin)]<sup>+</sup> (1.85 Å)

| NTO            | E(eV) | NTO Coeff                         | $f$    | $\alpha$ hole                                                                                                    | $\alpha$ particle                                                                                | $\beta$ hole                                                                                                       | $\beta$ particle                                                                                             |
|----------------|-------|-----------------------------------|--------|------------------------------------------------------------------------------------------------------------------|--------------------------------------------------------------------------------------------------|--------------------------------------------------------------------------------------------------------------------|--------------------------------------------------------------------------------------------------------------|
| D <sub>1</sub> | 0.83  | 99 ( $\alpha$ )<br>1 ( $\beta$ )  | 0.0007 | 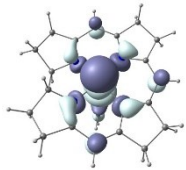<br>$d_z^2 + \pi_{1m}$          | <br>$\pi^*$    | <br>$d_{yz} + \pi$              | <br>$d_z^2 + \pi_{1m}^*$  |
| D <sub>2</sub> | 1.50  | 34 ( $\alpha$ )<br>66 ( $\beta$ ) | 0.0004 | <br>$\pi$                       | <br>$\pi^*$    | <br>$\pi$                       | <br>$\pi^*$               |
| D <sub>3</sub> | 1.54  | 92 ( $\alpha$ )<br>8 ( $\beta$ )  | 0.0016 | <br>$d_z^2 + \pi_{1m}$          | <br>$d_{xy}-n$ | <br>$d_{yx} + \pi$              | <br>$\pi^*$               |
| D <sub>4</sub> | 1.69  | 92 ( $\alpha$ )<br>8 ( $\beta$ )  | 0.0005 | <br>$d_z^2 + \pi_{1m}^*$       | <br>$\pi^*$   | <br>$d_{yz} + \pi + \pi_{1m}$  | <br>$d_z^2 + \pi_{1m}^*$ |
| D <sub>5</sub> | 1.77  | 11 ( $\alpha$ )<br>89 ( $\beta$ ) | 0.0018 | <br>$d_{xz} + \pi + \pi_{1m}$ | <br>$\pi^*$  | <br>$d_{xz} + \pi + \pi_{1m}$ | <br>$\pi^*$             |



**Figure S4.** NTOs of the first 10 TDDFT excited states of the  $[\text{Im-Co}^{\text{II}}(\text{corrin})]^+$  full structure at the BP86/6-311G (d,p) level of theory.

| NTO            | eV   | NTO<br>Coeff. & TDDFT<br>Character                                              | $f$    | $\alpha$ hole                                                                                                    | $\alpha$ particle                                                                               | $\beta$ hole                                                                                            | $\beta$ particle                                                                                         |
|----------------|------|---------------------------------------------------------------------------------|--------|------------------------------------------------------------------------------------------------------------------|-------------------------------------------------------------------------------------------------|---------------------------------------------------------------------------------------------------------|----------------------------------------------------------------------------------------------------------|
| D <sub>1</sub> | 1.27 | 6%( $\alpha$ ) H $\rightarrow$ L<br>94 %( $\beta$ ) H $\rightarrow$ L           | 0.0001 | 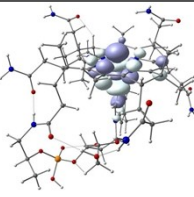<br>$d_z^2 + \pi_{\text{Im}}$   | <br>$\pi^*$   | <br>$d_{yz} + \pi$   | <br>$d_z^2 + \pi$     |
| D <sub>2</sub> | 1.42 | 100 %( $\beta$ ) H-1 $\rightarrow$ L                                            | 0.0001 |                                                                                                                  |                                                                                                 | <br>$d_{xz} + \pi$   | <br>$d_z^2 + \pi$     |
| D <sub>3</sub> | 1.48 | 37% ( $\alpha$ ) H-1 $\rightarrow$ L<br>63% ( $\beta$ ) H $\rightarrow$ L+1     | 0.0005 | <br>$d_{yz} + \pi_{\text{Im}}$ | <br>$\pi^*$  | <br>$d_{yz} + \pi$  | <br>$\pi^*$          |
| D <sub>4</sub> | 1.72 | 91% ( $\alpha$ ) H $\rightarrow$ L<br>8% ( $\beta$ )                            | 0.0074 | <br>$d_z^2 + \pi_{\text{Im}}$ | <br>$\pi^*$ | <br>$d_{yz} + \pi$ | <br>$d_z^2 + \pi^*$ |
| D <sub>5</sub> | 1.78 | 14 % ( $\alpha$ ) H-2 $\rightarrow$ L<br>85 % ( $\beta$ ) H-2 $\rightarrow$ L+1 | 0.0023 | <br>$d_{xz} + \pi$            | <br>$\pi^*$ | <br>$d_{xz} + \pi$ | <br>$\pi^*$         |
| D <sub>6</sub> | 2.00 | 14% ( $\alpha$ ) H-1 $\rightarrow$ L<br>86 % ( $\beta$ ) H-2 $\rightarrow$ L    | 0.0079 | <br>$d_{yz} + \pi$            | <br>$\pi^*$ | <br>$d_{x^2-y^2}$  | <br>$d_z^2$         |

|                 |      |                                                                                                          |        |                                                                                                       |                                                                                                    |                                                                                                                     |                                                                                                             |
|-----------------|------|----------------------------------------------------------------------------------------------------------|--------|-------------------------------------------------------------------------------------------------------|----------------------------------------------------------------------------------------------------|---------------------------------------------------------------------------------------------------------------------|-------------------------------------------------------------------------------------------------------------|
| D <sub>7</sub>  | 2.08 | 11% ( $\alpha$ ) H-3→L<br>89% ( $\beta$ ) H-2 → L+1<br><br>*H-3= $\pi + d_z^2$                           | 0.0027 | 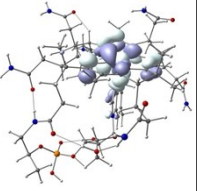<br>$d_{yz} + \pi$   | <br>$\pi^*$      | <br>$d_{x^2-y^2} + \pi$          | <br>$\pi^* + d_z^2$      |
| D <sub>8</sub>  | 2.15 | 60% ( $\alpha$ ) H-2→L<br>25% ( $\beta$ 1)<br>16% ( $\beta$ 2)                                           | 0.0080 | <br>$d_{xz} + \pi$   | <br>$\pi^*$      | <br>$d_{x^2-y^2} + d_{yz} + \pi$ | <br>$d_z^2 + \pi^*$      |
|                 |      |                                                                                                          |        |                                                                                                       |                                                                                                    | <br>$\pi$                        | <br>$d_z^2$              |
| D <sub>9</sub>  | 2.18 | 40% ( $\alpha$ ) H-1→L+1<br>35% ( $\beta$ 1) H-3→L<br>24% ( $\beta$ 2)                                   | 0.0064 | <br>$d_{yz} + \pi$  | <br>$d_{xy}-n$  | <br>$+ d_z^2$                   | <br>$\pi$<br>$d_z^2$    |
|                 |      |                                                                                                          |        |                                                                                                       |                                                                                                    | <br>$d_z^2 + d_{yz} + \pi$     | <br>$d_{xy}-n + \pi^*$ |
| D <sub>10</sub> | 2.23 | 36% ( $\alpha$ 1) H-1→L+1<br>26% ( $\alpha$ 2) H-2→L<br>22% ( $\beta$ 1) H→L+4<br>14% ( $\beta$ 2) H-3→L | 0.0018 | <br>$d_{yz} + \pi$ | <br>$d_{xy}-n$ | <br>$d_{yz} + \pi$             | <br>$d_{xy}-n$         |
|                 |      |                                                                                                          |        | <br>$d_{yz} + \pi$ | <br>$\pi^*$    | <br>$\pi + d_z^2$              | <br>$d_z^2$            |

**Figure S5.** Frontier orbitals of the cob(II)alamin full structure at the BP86/6-311G(d,p) level (left panel), and the BP86/SDD level (right panel).

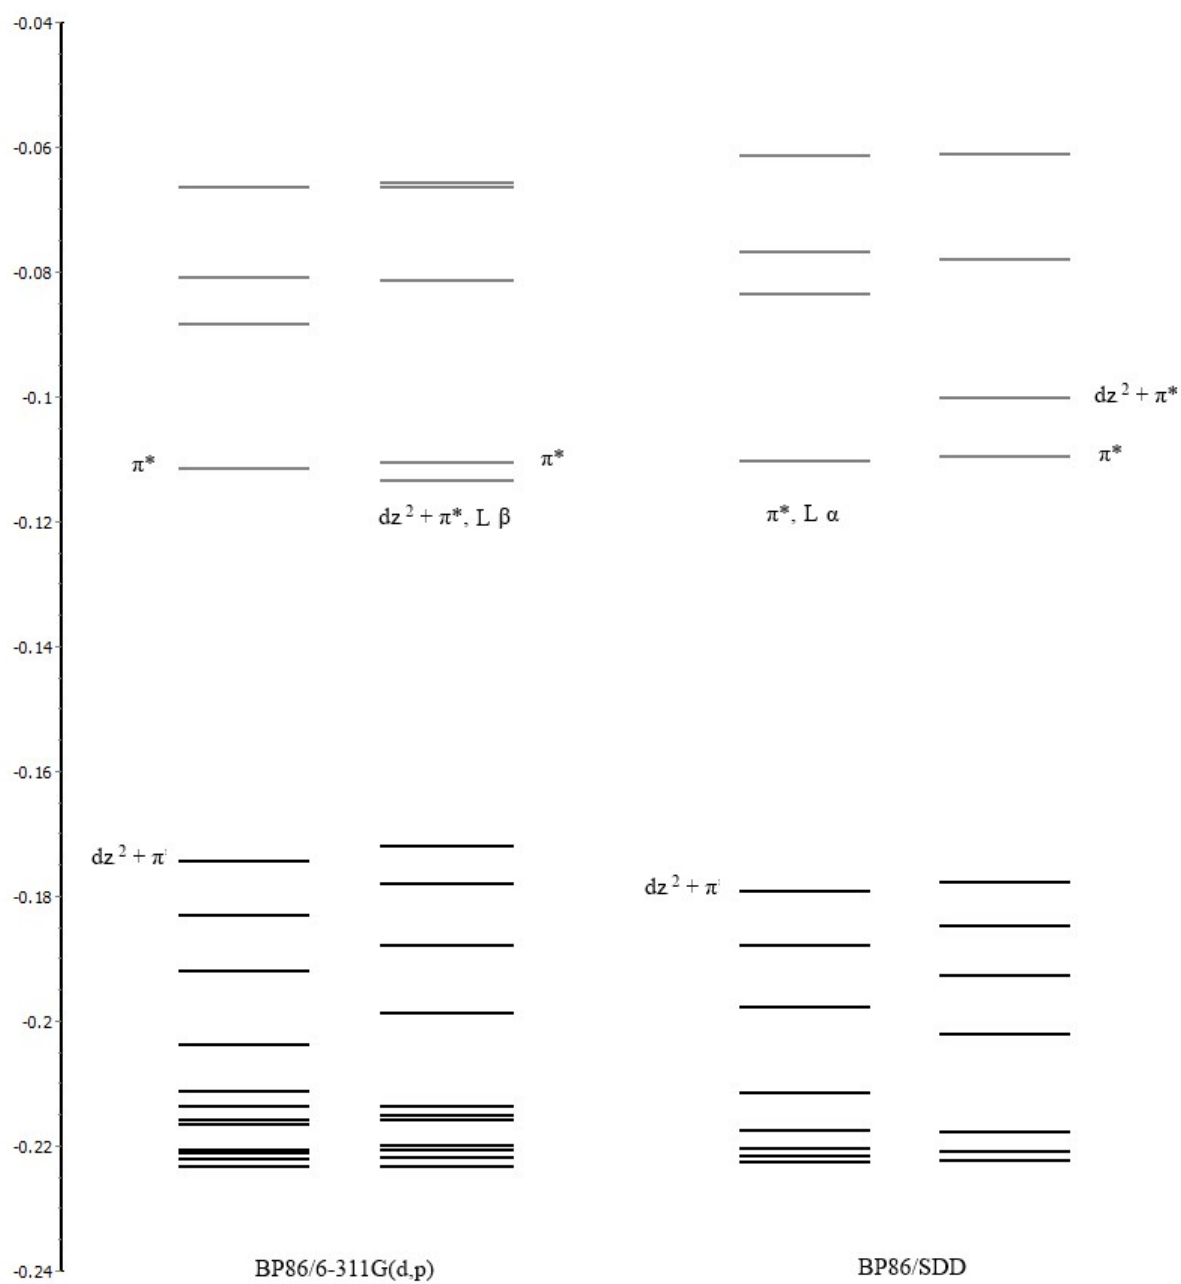

**Figure S6.** Frontier orbitals of the cob(II)alamin full structure at the BP86/SDD level of theory.

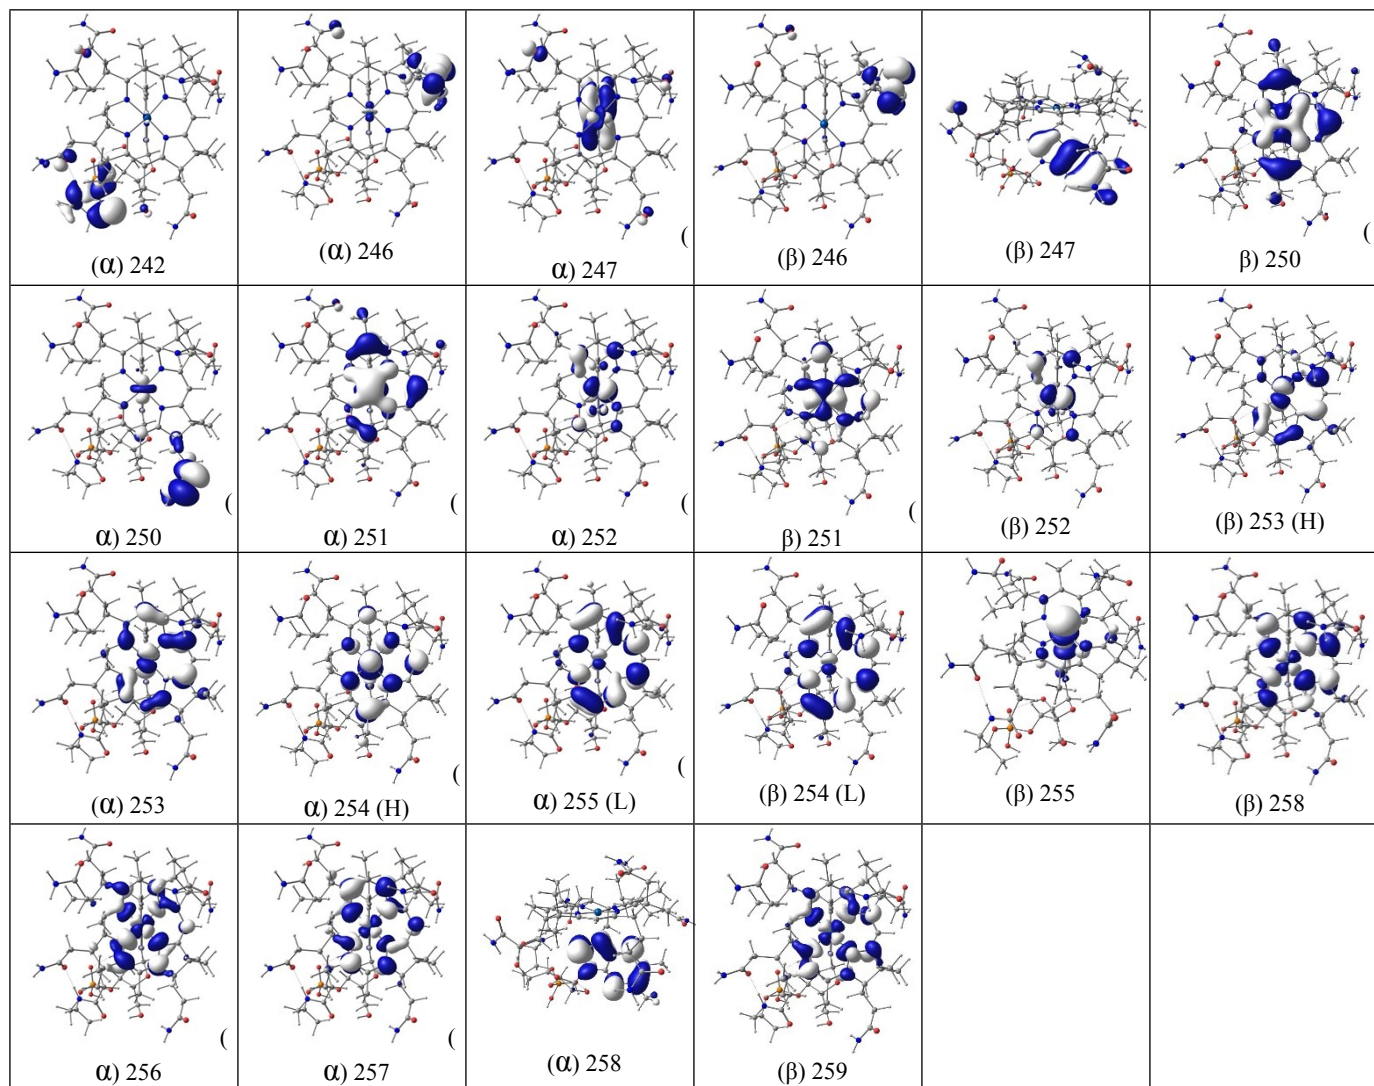

**Figure S7.** NTOs of the first 5 TDDFT excited states of cob(II)alamin at the BP86/SDD level of theory.

| NTO            | eV   | NTO Coeff                           | $f$    | $\alpha$ hole                                                                                                      | $\alpha$ particle                                                                               | $\beta$ hole                                                                                            | $\beta$ particle                                                                                          |
|----------------|------|-------------------------------------|--------|--------------------------------------------------------------------------------------------------------------------|-------------------------------------------------------------------------------------------------|---------------------------------------------------------------------------------------------------------|-----------------------------------------------------------------------------------------------------------|
| D <sub>1</sub> | 1.37 | 93% ( $\beta$ )<br>7% ( $\alpha$ )  | 0.0001 | 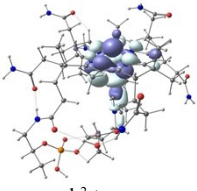<br>$d_z^2 + \pi_{1m}$            | <br>$\pi^*$   | <br>$d_{yz} + \pi$   | <br>$d_z^2 + \pi_{1m}$ |
| D <sub>2</sub> | 1.46 | 62% ( $\beta$ )<br>38% ( $\alpha$ ) | 0.0001 | <br>$d_{yz} + \pi$                | <br>$\pi^*$   | <br>$d_{yz} + \pi$   | <br>$\pi^*$            |
| D <sub>3</sub> | 1.53 | 96% ( $\beta$ )<br>4% ( $\alpha$ )  | 0.0005 | <br>$d_z^2 + \pi_{1m}$            | <br>$\pi^*$   | <br>$d_x + \pi$      | <br>$d_z^2 + \pi^*$    |
| D <sub>4</sub> | 1.76 | 80% ( $\alpha$ )<br>20% ( $\beta$ ) | 0.0074 | <br>$d_z^2 + \pi + \pi_{1m}$    | <br>$\pi^*$ | <br>$d_{xz} + \pi$ | <br>$\pi_{1m}^*$     |
| D <sub>5</sub> | 1.84 | 80% ( $\alpha$ )<br>20% ( $\beta$ ) | 0.0023 | <br>$d_z^2 + d_{xz} + \pi_{1m}$ | <br>$\pi^*$ | <br>$d_{xz} + \pi$ | <br>$\pi^*$          |

**Figure S8.** NTOs of selected TDDFT excited states of the cob(II)alamin full structure at the BP86/SDD (d,p) level of theory.

| NTO              | eV   | NTO Coeff.                              | $f$    | $\alpha$ hole                                                                                              | $\alpha$ particle                                                                               | $\beta$ hole                                                                                                 | $\beta$ particle                                                                                              |
|------------------|------|-----------------------------------------|--------|------------------------------------------------------------------------------------------------------------|-------------------------------------------------------------------------------------------------|--------------------------------------------------------------------------------------------------------------|---------------------------------------------------------------------------------------------------------------|
| D <sub>19</sub>  | 2.71 | 46% ( $\alpha,1$ )<br>29% ( $\beta,1$ ) | 0.0276 | 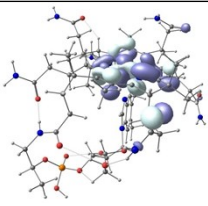<br>$d_{x^2-y^2} + \pi$   | <br>$\pi^*$   | <br>$d_{x^2-y^2} + \pi$   | <br>$d_{z^2} + \pi_{1m}^*$ |
|                  |      | 25% ( $\alpha,2$ )                      |        | <br>$d_z^2 + \pi$         | <br>$\pi^*$   |                                                                                                              |                                                                                                               |
| D <sub>29</sub>  | 2.93 | 63% ( $\alpha,1$ )<br>19% ( $\beta,1$ ) | 0.0377 | <br>$\pi_{1m} + p$       | <br>$\pi^*$  | <br>$\pi_{1m}$           | <br>$\pi^*$               |
|                  |      | 19% ( $\alpha,2$ )                      |        | <br>$\pi + d_z^2$       | <br>$\pi^*$ |                                                                                                              |                                                                                                               |
| D <sub>61</sub>  | 3.39 | 78% ( $\beta$ )<br>22% ( $\alpha$ )     | 0.0263 | <br>$d_{xz} + \pi_{1m}$ | <br>$\pi^*$ | <br>$d_{xz} + \pi$      | <br>$\pi^*$              |
| D <sub>144</sub> | 3.95 | 60% ( $\beta$ )<br>40% ( $\alpha$ )     | 0.0923 | <br>$\pi_p$             | <br>$\pi^*$ | <br>$d_{x^2-y^2} + \pi$ | <br>$d_{xy-n}$           |

**Figure S9.** NTOs of selected TDDFT excited states of the  $[\text{Im-Co}^{\text{II}}(\text{corrin})]^+$  (min, 2.13 Å) model at the BP86/6-311g (d,p) level of theory.

| NTO             | eV   | NTO Coeff.                                | $f$    | $\alpha$ hole                                                                                                           | $\alpha$ particle                                                                                 | $\beta$ hole                                                                                                             | $\beta$ particle                                                                                         |
|-----------------|------|-------------------------------------------|--------|-------------------------------------------------------------------------------------------------------------------------|---------------------------------------------------------------------------------------------------|--------------------------------------------------------------------------------------------------------------------------|----------------------------------------------------------------------------------------------------------|
| D <sub>23</sub> | 3.00 | 32 % ( $\alpha,1$ )<br>30 % ( $\beta,1$ ) | 0.0160 | 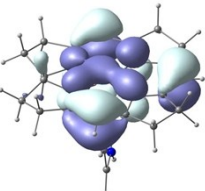<br>$\pi + d_z^2$                      | <br>$\pi^*$     | <br>$d_{x^2-y^2}$                     | <br>$d_{xy-n}$        |
|                 |      | 17 % ( $\alpha,2$ )<br>30 % ( $\beta,2$ ) |        | <br>$d_z^2 + \pi$                      | <br>$\pi^*$     | <br>$\pi$                             | <br>$d_{z^2} + \pi^*$ |
| D <sub>33</sub> | 3.38 | 75 % ( $\beta$ )<br>25 % ( $\alpha$ )     | 0.0500 | <br>$d_{x^2-y^2}$                     | <br>$d_{xy-n}$ | <br>$d_{xz} + \pi$                   | <br>$\pi^*$          |
| D <sub>45</sub> | 3.80 | 89 % ( $\alpha$ )<br>11 % ( $\beta$ )     | 0.0689 | <br>$d_{xz} + \pi + \pi_{\text{Im}}$ | <br>$\pi^*$   | <br>$d_{xz} + \pi$                  | <br>$\pi^*$         |
| D <sub>56</sub> | 4.09 | 37 % ( $\alpha,1$ )<br>33 % ( $\beta,1$ ) | 0.2433 | <br>$\pi + \pi_{\text{Im}} + d_z^2$  | <br>$\pi^*$   | <br>$\pi + \pi_{\text{Im}} + d_z^2$ | <br>$\pi^*$         |
|                 |      | 13 % ( $\alpha,2$ )<br>18 % ( $\beta,2$ ) |        | <br>$\pi$                            | <br>$\pi^*$   | <br>$\pi$                           | <br>$d_z^2$         |

**Figure S10.** NTOs of selected TDDFT excited states of the [Im- - Co<sup>II</sup>(corrin)]<sup>+</sup><sub>(LF, 2.80 Å)</sub> model at the BP86/6-311g (d,p) level of theory.

| NTO             | eV   | NTO Coeff.                                | <i>f</i> | $\alpha$ hole                                                                                         | $\alpha$ particle                                                                                 | $\beta$ hole                                                                                         | $\beta$ particle                                                                                             |
|-----------------|------|-------------------------------------------|----------|-------------------------------------------------------------------------------------------------------|---------------------------------------------------------------------------------------------------|------------------------------------------------------------------------------------------------------|--------------------------------------------------------------------------------------------------------------|
| D <sub>17</sub> | 2.73 | 58 % ( $\alpha$ )<br>42 % ( $\beta$ )     | 0.0455   | 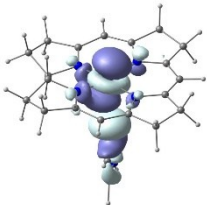<br>$d_z^2 + \pi$    | <br>$\pi^*$     | <br>$d_z^2 + \pi$ | <br>$\pi^*$               |
| D <sub>26</sub> | 3.09 | 66 % ( $\alpha$ )<br>34 % ( $\beta$ )     | 0.0953   | <br>$\pi + d_z^2$    | <br>$\pi^*$     | <br>$d_{x^2-y^2}$ | <br>$\pi^*$               |
| D <sub>33</sub> | 3.44 | 74 % ( $\beta$ )<br>26 % ( $\alpha$ )     | 0.0520   | <br>$\pi + d_z^2$   | <br>$d_{xy}-n$ | <br>$\pi$        | <br>$d_z^2 + \pi_{Im}^*$ |
| D <sub>54</sub> | 4.06 | 40 % ( $\alpha,1$ )<br>33 % ( $\beta,1$ ) | 0.2472   | <br>$\pi + d_z^2$  | <br>$\pi$     | <br>$\pi$       | <br>$\pi^*$             |
|                 |      | 15 % ( $\alpha,2$ )<br>12 % ( $\beta,2$ ) |          | <br>$\pi + d_{yz}$ | <br>$\pi^*$   | <br>$\pi$       | <br>$d_{yz} + \pi^*$    |
